# Supplementary material for: Erysipelothrix rhusiopathiae clone associated with recurrent mass mortality events in High Arctic muskoxen (Ovibos moschatus)
Source: Research Square preprint supplement (doi:10.21203/rs.3.rs-7384235/v1), 2025-09-10
Supplement: Supplementary file 1 [file 972f92dfe6b381a175940b50.docx]

**Supplementary Information**

***Erysipelothrix rhusiopathiae* clone associated with recurrent mass mortality events in High Arctic muskoxen (*Ovibos moschatus*)**

McCaide T. Wooten1*, Taya L. Forde2, Amélie Roberto-Charron3, Matthew Fredlund3, Tabitha Mullin3, Olaf A. Christensen3, Angela Schneider1, Sreejith Radhakrishnan2†, Dayna Goldsmith1,4, Eugene Lau2, Fabien Mavrot1, L. Vineesha Seru1, Tianjiao Fang2, Ronan M. Donovan5,6, H. Dean Cluff7, Frank van der Meer1, Susan J. Kutz1

**Affiliations:**

1Faculty of Veterinary Medicine, University of Calgary; Calgary, Alberta, Canada

2School of Biodiversity, One Health, and Veterinary Medicine, University of Glasgow; Glasgow, Scotland, United Kingdom

3Department of Environment, Government of Nunavut; Kugluktuk (Roberto-Charron), Igloolik (Fredlund), Resolute Bay (Mullin), Grise Fiord (Christensen), Nunavut, Canada

4Canadian Wildlife Health Cooperative; Saskatoon, Saskatchewan, Canada

5Ronan Donovan Photo & Film; Bozeman, Montana, United States

6The National Geographic Society; Washington, D.C., United States

7Department of Environment and Climate Change, Government of the Northwest Territories; Yellowknife, Northwest Territories, Canada (retired)

†Current Affiliation: HCAI, Fungal, AMR, AMU & Sepsis Division, UK Health Security Agency, London, United Kingdom

*Corresponding author: caide.wooten.dvm@gmail.com

**Supplementary Tables**

| **Supplementary Table 1.** Summary of gross pathological , histological, and non-*E. rhusiopathiae* microbiological findings from all definitive and presumptive cases of *E. rhusiopathiae* Arctic clone septicemia | | | | | | |
| --- | --- | --- | --- | --- | --- | --- |
| Carcass ID | Date of Death | Initial Sample Date | Sex / Age (Years) | Gross Observations | Significant Histopathological Findings | Other Testing |
| MX-21-01 | ~18-Aug-2021 | 21-Aug-2021 | F / 3 | MA, abdomen opened with heavy scavenging, moderate epicardial fat stores, yellow-tinged liver, NSF on joint exam | MA, occasional sarcocysts within skeletal muscle | *Parapoxvirus* Negative |
| MX-21-02 | ~1-9 Aug-2021 | 21-Aug-2021 | F / ≥5 | MA, intact, bloated and odorous, some evidence of scavenging (holes in skin), regurgitant in oral cavity, 1cm back fat (adequate BC), yellow-tinged liver, excessive bicavitary serosanguinous fluid accumulation | MA, histologic evaluation hindered by autolysis | *B. anthracis*, *Parapoxvirus*, *Yersinia* spp.Negative |
| MX-21-03 | ~1-9 Aug-2021 | 21-Aug-2021 | F / ≥5 | Found in lateral along creek with head and thorax submerged in water, abdomen opened with heavy scavenging, unable to assess BC | MA, NSF on examined tissues (haired skin and tongue), one intracytoplasmic sarcocyst observed in lingual muscle | *Parapoxvirus* Negative |
| MX-21-04 | ~18-Aug-2021 | 21-Aug-2021 | M / ≥5 | MA, testes scavenged but otherwise intact and bloated, blood staining from nares, multifocal 4-10mm ulceration of the nasal mucosa, mild perineal fecal matting, regurgitant in oral cavity, 2cm back fat (good BC), plenty of peri-renal fat, yellow-tinged liver, excessive bicavitary serosanguinous fluid accumulation | MA, histologic evaluation hindered by autolysis | *B. anthracis*, *Parapoxvirus*, *Yersinia* spp. Negative |
| MX-21-05 | ~3-11 Aug-2021 | 21-Aug-2021 | F / ≥5 | Ground disturbance at the feet indicative of terminal struggle, odorous, evidence of mild scavenging (missing eyes, hair removed) but otherwise intact, desiccated tongue and nasal tissue, limited necropsy | ND | ND |
| MX-21-06 | ~1-9 Aug-2021 | 22-Aug-2021 | M / ≥5 | MA, ground disturbance at the feet indicative of terminal struggle, scavenged testes but otherwise intact, blood staining of the muzzle and perineum, firm feces in the perineal hair, 4cm back fat (excellent BC), excessive bicavitary serosanguinous fluid accumulation | MA, only haired skin submitted for evaluation, NSF aside from one section containing a single cross-section of a suspected mite within a hair follicle | *Parapoxvirus* Negative |
| MX-21-07 | ~1-9 Aug-2021 | 22-Aug-2021 | M / ≥5 | MA, ground disturbance at the feet indicative of terminal struggle, scavenged testes but otherwise intact, hair completely sloughed from right forelimb, 2.8cm back fat (good BC), limited necropsy | ND | ND |
| MX-21-08 | ~5-13 Aug-2021 | 22-Aug-2021 | M / 4 | MA, scavenged testes but otherwise intact, blood staining of the muzzle, 3.2cm back fat (excellent BC), limited necropsy | MA, only haired skin submitted for evaluation, NSF | *Parapoxvirus* Negative |
| MX-21-09 | ~25 Jul – 1 Aug-2021 | 23-Aug-2021 | M / 3 | Small opening in the lower left abdominal wall with entry into the rumen and testes scavenged otherwise intact, some solid feces in perineal hair, 1.5cm back fat (good BC), plenty of intraperitoneal fat, yellow-green viscous fluid in the left tarsometatarsal joint | MA, diffuse vacuolation of hepatocytes possibly indicative of underlying fatty liver disease or secondary to autolysis | *B. anthracis*, *Parapoxvirus*, *Yersinia* spp. Negative |
| MX-21-10 | ~1-9 Aug-2021 | 23-Aug-2021 | F / ≥5 | Intact and unscavenged, blood staining of the muzzle, 2.5cm back fat (good BC), limited necropsy | ND | *Parapoxvirus* Negative |
| MX-21-13 | ~Early Aug-2021 | 16-Aug-2022 | M / 4 | First visited well beyond the time of death – necropsy ND | ND | ND |
| MX-21-15 | ~Early Aug-2021 | 5-Aug-2023 | M / 4 | First visited well beyond the time of death – necropsy ND | ND | ND |
| MX-21-16 | ~Early-to-mid Aug-2021 | 15-Aug-2022 | M / ≥5 | First visited well beyond the time of death – necropsy ND | ND | ND |
| MX-21-19 | ~Mid-Aug-2021 | 16-Aug-2022 | M / 4 | First visited well beyond the time of death – necropsy ND | ND | ND |
| MX-21-21 | ~Early-to-mid Aug-2021 | 18-Aug-2022 | M / ≥5 | First visited well beyond the time of death – necropsy ND | ND | ND |
| MX-21-24 | ~Mid-Aug-2021 | 18-Aug-2022 | M / ≥5 | First visited well beyond the time of death – necropsy ND | ND | ND |
| MX-21-25 | ~Mid-to-late Aug 2021 | 26-Jul-2022 | M / ≥5 | First visited well beyond the time of death – necropsy ND | ND | ND |
| MX-21-26A | 12-Sep-2021 | 14-Aug-2022 | M / ≥5 | First visited well beyond the time of death – necropsy ND | ND | ND |
| MX-21-26B | ~13-16 Sep-2021 | 14-Aug-2022 | F / 4 | First visited well beyond the time of death – necropsy ND | ND | ND |
| MX-22-40 | 26-Aug-2021 | 16-Aug-2022 | F / ≥5 | First visited well beyond the time of death – necropsy ND | ND | ND |
| MX-22-44 | ~Spring 2022 | 18-Aug-2022 | U / 1 | First visited well beyond the time of death – necropsy ND | ND | ND |
| MX-22-46 | ~Fall 2021 to Spring 2022 | 19-Aug-2022 | M / ≥5 | First visited well beyond the time of death – necropsy ND | ND | ND |
| MX-22-F-01 | ~25-26 Jul-2022 | 27-Jul-2022 | M / 4 | MA, fully intact and unscavenged, ground disturbance at the feet indicative of terminal struggle, body cavity is warm, bloated rumen, mild ocular discharge and crusting, 0.1cm back fat (poor BC) | MA, liver and lung contain intracytoplasmic bacterial rods without convincing inflammation, NSF on evaluation of kidney and haired skin sections | *Salmonella* spp., *Yersinia* spp. Negative |
| MX-22-F-02 | ~26-27 Jul-2022 | 28-Jul-2022 | F / 4 | MA, heavily scavenged, no internal organs, skin and muscle fully removed from the face | MA, mild orthokeratotic hyperkeratosis throughout section of haired skin analyzed | ND |
| *MX-22-F-03 | 30-Jul-2022 | 30-Jul-2022 | M / ≥5 | Fully intact and unscavenged, observed struggling before death, 0.8cm back fat (adequate BC), NSF on necropsy | WP, Lung: discernible bacilli in interstitium and vessels  Heart: vessels contain free small bacilli;  Liver: portal areas infiltrated by small numbers of lymphocytes and plasma cells, small infiltrates of suspected histiocytes randomly throughout parenchyma, neutrophils, lymphocytes and plasma cells associated with basophilic cytoplasmic material within histiocytes and hepatocytes (suspect bacteria) - in some areas these infiltrates are associated with small numbers of degenerating hepatocytes;  Kidney: multifocal small interstitial infiltrates of lymphocytes and plasma cells, sometimes associated with blood vessels, frequent medullary blood vessels containing large numbers of bacteria variably admixed with neutrophils - also occasionally within tubules, rare bacteria within histiocytes;  Small intestine: markedly dilated submucosal lymphatic vessels, autolysis hinders evaluation of the superficial mucosa, rare luminal suspect oocysts;  Haired skin: small numbers of sarcocysts within the attached deep skeletal muscle | *Parapoxvirus*, *Salmonella* spp., *Yersinia* spp. Negative |
| MX-22-F-04 | ~17-24 Jul-2022 | 31-Jul-2022 | F / ≥5 | MA, moderately scavenged and odorous, internal organs cannot be assessed due to autolysis | MA, remnants of the exoskeleton of a single mite visible in one section of haired skin, abundant black birefringent pigment present in the spleen – suspect artifactual hematin | *Parapoxvirus* Negative |
| *MX-22-F-05 | 31-Jul-2022 | 31-Jul-2022 | M / ≥5 | Fully intact and unscavenged, ground disturbance at the feet indicative of terminal struggle, 1cm back fat (adequate BC), yellow-tinged liver with multifocal petechiae across the serosal surface | WP, Lung: interlobular septae expanded by clear space (edema), some blood vessels associated with aggregates of small lymphocytes;  Liver: multifocal infiltration by very large numbers of extracellular and intracellular bacteria, infiltrates are both portal and randomly distributed and are variably associated with small numbers of neutrophils as well as areas of hepatocellular necrosis, centrilobular hepatocytes have cytoplasmic accumulation of fine brown granular cytoplasmic pigment (lipofuscin suspected);  Spleen: frequent accumulation of coarsely granular brown pigment (hemosiderin) as well as accumulation of black birefringent pigment - suspect artifactual hematin;  Kidney: multifocal proliferation of extracellular bacteria within interstitium with mild to marked inflammation | *Parapoxvirus*, *Salmonella* spp., *Yersinia* spp. Negative |
| MX-22-F-06 | 31-Jul-2022 | 31-Jul-2022 | F / ≥5 | Fully intact and unscavenged, body cavity warm, 1cm back fat (adequate BC), mild ocular discharge, limited necropsy due to limited remaining flight time | WP, focal area of mild orthokeratotic hyperkeratosis in section of poorly haired skin (nasal skin), NSF within the examined sections of haired skin | *Parapoxvirus* Negative |
| MX-23-76 | ~Jul/Aug 2023 | 28-Aug-2023 | M / ≥5 | MA, heavily scavenged – no internal organs remain, blood staining of the muzzle | ND | ND |
| MX-23-F-01 | ~25-31 Jul-2023 | 4-Aug-2023 | M / ≥5 | MA, fully intact and unscavenged but severely bloated – not opened, NSF on external examination | ND | *Parapoxvirus* Negative |
| MX-23-F-03 | ~3-10 Aug-2023 | 12-Aug-2023 | M / ≥5 | MA, intact and minimally scavenged, ground disturbance at the feet indicative of terminal struggle, yellow-tinged liver, splenomegaly, distended urinary bladder, reddened small intestine, 0.1cm back fat, no renal fat (poor BC), fecal matting of the perineum | MA, myocytes occasionally contain cytoplasmic sarcocysts, abundant epicardial fat is present | *Parapoxvirus*, *Salmonella* spp., *Yersinia* spp. Negative |
| NOTE: *Er* test results are not listed as all definitive and presumptive cases tested positive for the *Er* AC by culture with follow-up genetic confirmation of the recovered bacteria; for full descriptions of diagnostic testing, see Methods  Abbreviations: BC = body condition, MA = marked autolysis, ND = not done, NSF = no significant findings, WP = well-preserved  *Definitive case | | | | | | |

| **Supplementary Table 2.** Summary of clinical abnormalities observed in video footage of muskoxen on the Fosheim Peninsula of Ellesmere Island, mid-July to late September 2021 | | | |
| --- | --- | --- | --- |
| System | Affected Sex(es) | Affected Age Class(es) | Description |
| Integumentary | Both | All except calves | - Many animals possessed periorbital pallor/whiteness, producing a “raccoon-like” appearance from a distance; closer inspection generally revealed varying degrees of alopecia +/- crusty debris and/or non-purulent discharge - Two animals had notable epilation/alopecia over regions of the nasal and maxillary bones (i.e., most of the “bridge” of the nose) - One animal appeared to have focal crusts at the caudodorsal area of the nasal planum |
| Musculoskeletal | Both | Adults | - Two or three animals were noted to have weight-bearing lameness of one limb; one of these animals had a visibly enlarged carpal joint |
| Ophthalmic | Both | Adults | - One animal had loss of its left eye or severe conjunctivitis obliterating the globe (i.e., only pink conjunctiva was visible) |

| **Supplementary Table 3.** Summary of live muskox observations stratified by year, sex, location, and observational unit | | | | | |
| --- | --- | --- | --- | --- | --- |
|  | *Counts by Sex* | | | |  |
| Year | Male (%) | Female (%) | Juvenile Unclassified (%)1 | Unclassified (%) | Total |
| ***Ellesmere Island –*** *Ground Observations* | | | | | |
| 2022 | 21 (30.4) | 8 (11.6) | 4 (5.8) | 36 (52.2) | 69 |
| 2023 | 26 (28.3) | 38 (41.3) | 11 (11.9) | 17 (18.5) | 92 |
| 2024* | 24 (16.9) | 46 (32.4) | 39 (27.5) | 33 (23.2) | 142 |
| ***Ellesmere Island -*** *Aerial Observations* | | | | | |
| 2022 | 115 (29.0) | 61 (15.4) | 16 (4.0) | 205 (51.6) | 397 |
| 2023 | 84 (20.6) | 48 (11.8) | 58 (14.2) | 218 (53.4) | 408 |
|  |  |  |  |  |  |
| ***Axel Heiberg Island –*** *Aerial Observations* | | | | | |
| 2022* | 109 (17.4) | 48 (7.6) | 52 (8.3) | 418 (66.7) | 627 |
| 2023 | 152 (26.7) | 93 (16.3) | 89 (15.6) | 236 (41.4) | 570 |
| *Indicated years had significantly different (p < 0.05) adjusted sex compositions (male:female, ≥2 years old) relative to calculated “norms” (see Methods, Supplementary Table 4) when evaluated using chi-square tests (Supplementary Table 5).  1”Juvenile Unclassified” animals were those confirmed to be calves or yearlings. | | | | | |

| **Supplementary Table 4.** Summary of muskox population data collected from stable populations in July/August | | | | | | | | | |
| --- | --- | --- | --- | --- | --- | --- | --- | --- | --- |
|  |  |  | *Age/Sex Category* | | | | |
| Location | Survey Date(s) | ≥2 Years, Male (%) | ≥2 Years, Female (%) | ≥2 Years, Male:Female | ≥2 Years, Overall (%) | Yearling (%) | Calf (%) | Total | Reference |
| Northeastern Prince of Wales Island | August 25, 1983 | 33 (35.9) | 36 (39.1) | 0.917 | 69 (75.0) | 8 (8.7) | 15 (16.3) | 92 | Gunn, *et al.* |
| Minto Inlet, Victoria Island | July 16-24, 1986 | 194 (32.0) | 220 (36.3) | 0.882 | 414 (68.3) | 66 (10.9) | 126 (20.8) | 606 |
| Prince Albert Sound, Victoria Island | 57 (25.7) | 88 (39.6) | 0.648 | 145 (65.3) | 23 (10.4) | 54 (24.3) | 222 |
| Richard Collinson Inlet, Victoria Island | 88 (24.1) | 142 (38.9) | 0.620 | 230 (63.0) | 61 (16.7) | 74 (20.3) | 365 |
| Wynniatt Bay, Victoria Island | 120 (30.6) | 137 (34.9) | 0.876 | 257 (65.6) | 66 (16.8) | 69 (17.6) | 392 |
| Thomsen River, Banks Island | July 25 – August 3, 1986 | 456 (33.4) | 609 (44.6) | 0.749 | 1065 (78.0) | 124 (9.1) | 176 (12.9) | 1366 |
| Parker River, Banks Island | 291 (38.9) | 284 (38.0) | 1.025 | 575 (76.9) | 113 (15.1) | 60 (8.0) | 748 |
| Mercy Bay, Banks Island | 89 (34.5) | 98 (38.0) | 0.908 | 187 (72.5) | 25 (9.7) | 46 (17.8) | 258 |
| Jesse Bay, Banks Island | 199 (26.4) | 314 (41.6) | 0.634 | 513 (68.0) | 119 (15.8) | 122 (16.2) | 754 |
| Castel Bay, Banks Island | 99 (41.4) | 89 (37.2) | 1.112 | 188 (78.7) | 22 (9.2) | 29 (12.1) | 239 |
| Big River, Banks Island | 139 (27.9) | 197 (39.5) | 0.706 | 336 (67.3) | 62 (12.4) | 101 (20.2) | 499 |
| Southeast Victoria Island | August 6-13, 1988 | 352 (25.0) | 611 (43.4) | 0.576 | 963 (68.3) | 233 (16.5) | 213 (15.1) | 1409 | Gunn & Patterson |
| Queen Maud Gulf Region,  Canadian Mainland | August 9-12, 1988 | 480 (32.7) | 729 (49.6) | 0.658 | 1209 (82.2) | 109 (7.4) | 152 (10.3) | 1470 | Gunn & Sutherland |
| South Ellesmere Island | July 17-23, 1989 | 33 (20.1) | 82 (50.0) | 0.402 | 115 (70.1) | 14 (8.5) | 26 (15.9) | 164 | Case & Ellsworth |
| Svendsen Peninsula, Ellesmere Island | 31 (34.8) | 36 (40.4) | 0.861 | 67 (75.3) | 4 (4.5) | 17 (19.1) | 89 |
| East Vendom Fiord, Ellesmere Island | 30 (33.7) | 36 (40.4) | 0.833 | 66 (74.2) | 14 (15.7) | 7 (7.9) | 89 |
| Bjorne Peninsula, Ellesmere Island | 22 (21.8) | 56 (55.4) | 0.393 | 78 (77.2) | 8 (7.9) | 15 (14.9) | 101 |
| Southwest Ellesmere Island | 18 (14.5) | 64 (51.6) | 0.281 | 82 (66.1) | 8 (6.5) | 34 (27.4) | 124 |
| **Mean Categorical Percentage/Ratio (SD)** | | **29.6 (±6.96)** | **42.2 (±5.81)** | **0.727 (0.503-0.951)** | **71.8 (±5.59)** | **11.2 (±3.96)** | **16.5 (±5.19)** |  |  |

| **Supplementary Table 5.** Results of chi-square tests comparing distributions of age and sex classes of live muskoxen observed in this study against calculated seasonal values from stable populations* | | | | |
| --- | --- | --- | --- | --- |
| Analytical Group | Year | Statistic | *df* | p |
| **Ellesmere Island –** *Ground Observations* | | | | |
| Age1 | 2022 | 14.4 | 2 | **<0.001** |
| 2023 | 14.2 | 2 | **<0.001** |
| 2024 | 0.64 | 2 | 0.725 |
| Sex2 | 2022 | 0.3 | 1 | 0.607 |
| 2023 | 0.8 | 1 | 0.366 |
| 2024 | 6.0 | 1 | **0.01** |
| **Ellesmere Island –** *Aerial Observations* | | | | |
| Age1 | 2022 | 108.0 | 2 | **<0.001** |
| 2023 | 15.0 | 2 | **<0.001** |
| Sex2 | 2022 | 0.2 | 1 | 0.670 |
| 2023 | 1.3 | 1 | 0.263 |
| **Axel Heiberg Island –** *Aerial Observations* | | | | |
| Age1 | 2022 | 87.3 | 2 | **<0.001** |
| 2023 | 20.8 | 2 | **<0.001** |
| Sex2 | 2022 | 7.4 | 1 | **0.006** |
| 2023 | 0.4 | 1 | 0.508 |
| *See Methods, Supplementary Table 4 for derivation of stable population values  1Age categories: ≥2 Years, Yearling, Calf  2Sex categories: Male, Female (only animals ≥2 years old) | | | | |

|  |
| --- |

| Supplementary Table 6. Probe sequences used in this study | | |
| --- | --- | --- |
|  | | |
| Probe Name | Sequence | |
| *E. rhusiopathiae* probe | 5’-/6-FAM/AAC GAA ACG/ZEN/ATT AGT AGT CCA ACA/IABkFQ/-3’ | |
| *E. tonsillarum* probe | 5’-/Cy5/AAA TAT TCA/TAO/TGA GAC AAT CAG CAG T/IAbRQ/-3’ | |
| *E. rhusiopathiae* Arctic clone probe | 5’-/TAMN/TCA CTG TTG ATG GAA AAC TTC GGA GA/IAbRQ/-3’ | |
| Abbreviations: 6-FAM, 6-Carboxyfluorescein; ZEN, ZEN™ internal quencher; IABkFQ, Iowa Black® FQ; Cy5, Cyanine 5; TAO, TAO™ internal quencher; IAbRQ, Iowa Black® RQ; TAMN, Tetramethylrhodamine N-Hydroxysuccinimide Ester | |

| **Supplementary Table 7.** Primer sequences used in this study | | | |
| --- | --- | --- | --- |
| Primer Name | Gene Target | Sequence | Reference |
| ***Erysipelothrix rhusiopathiae*** **(general)** | | | |
| Ery4423F | Noncoding region downstream from 5S rRNA gene | 5’-ATT TCT CTA GCA GGT GAT TTG G-3’ | Pal, *et al.* |
| Ery4587R | 5’-ACC CTC TAA TCG ATA TGC ATC A-3’ |
| ***Erysipelothrix rhusiopathiae*****(Arctic clone)** | | | |
| ArcticCloneF | hhalm_1 DNA methyltransferase | 5’-AAA ATC GCT CGG CCA CTT TT-3’ | This publication |
| ArcticCloneR | 5’-TAG TGA TTC TCG TGG CGT CA-3’ |
| ***Parapoxvirus*** | | | |
| PPP-1 | B2L Envelope Protein | 5’-GTC GTC CAC GAT GAG CAG CT-3’ | Inoshima, *et al.* |
| PPP-4 | 5’- TAC GTG GGA AGC GCC TCG CT-3’ |
| VIR-F | Interferon Resistance | 5’-TTA GAA GCT GAT GCC GCA G-3’ | Guo, *et al.* |
| VIR-R | 5’- ACA ATG GCC TGC GAG TG-3’ |
| PPV/DNApol-F | DNA Polymerase | 5’- GCG AGC ACC TGC ATC AAG-3’ | Bracht, *et al.* |
| PPV/DNApol-R | 5’-CTG TTI CGG AAG CCC ATG AG-3’ |

**Supplementary Figures**


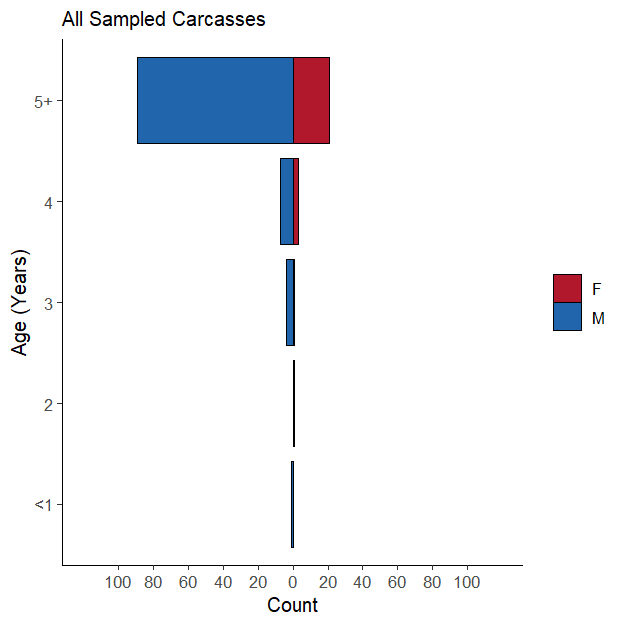

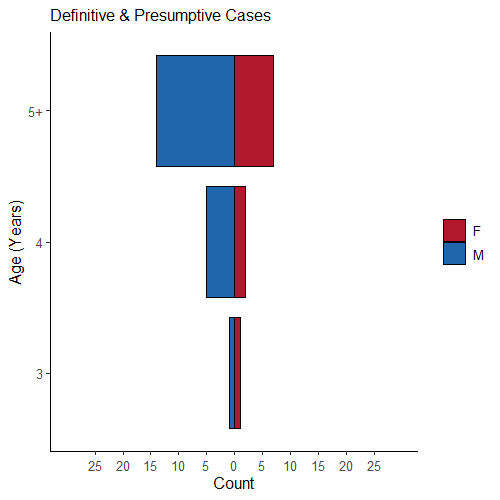


**A**

**B**

**Supplementary Figure 1. Population pyramid plots for muskox carcasses evaluated between 2021 and 2024.** Carcasses defined as definitive & presumptive cases of *Er* septicemia(n = 30) are shown in panel A, and all sampled carcasses (n = 127) are shown in panel B. Data are restricted to those carcasses for which both sex and age data were available.


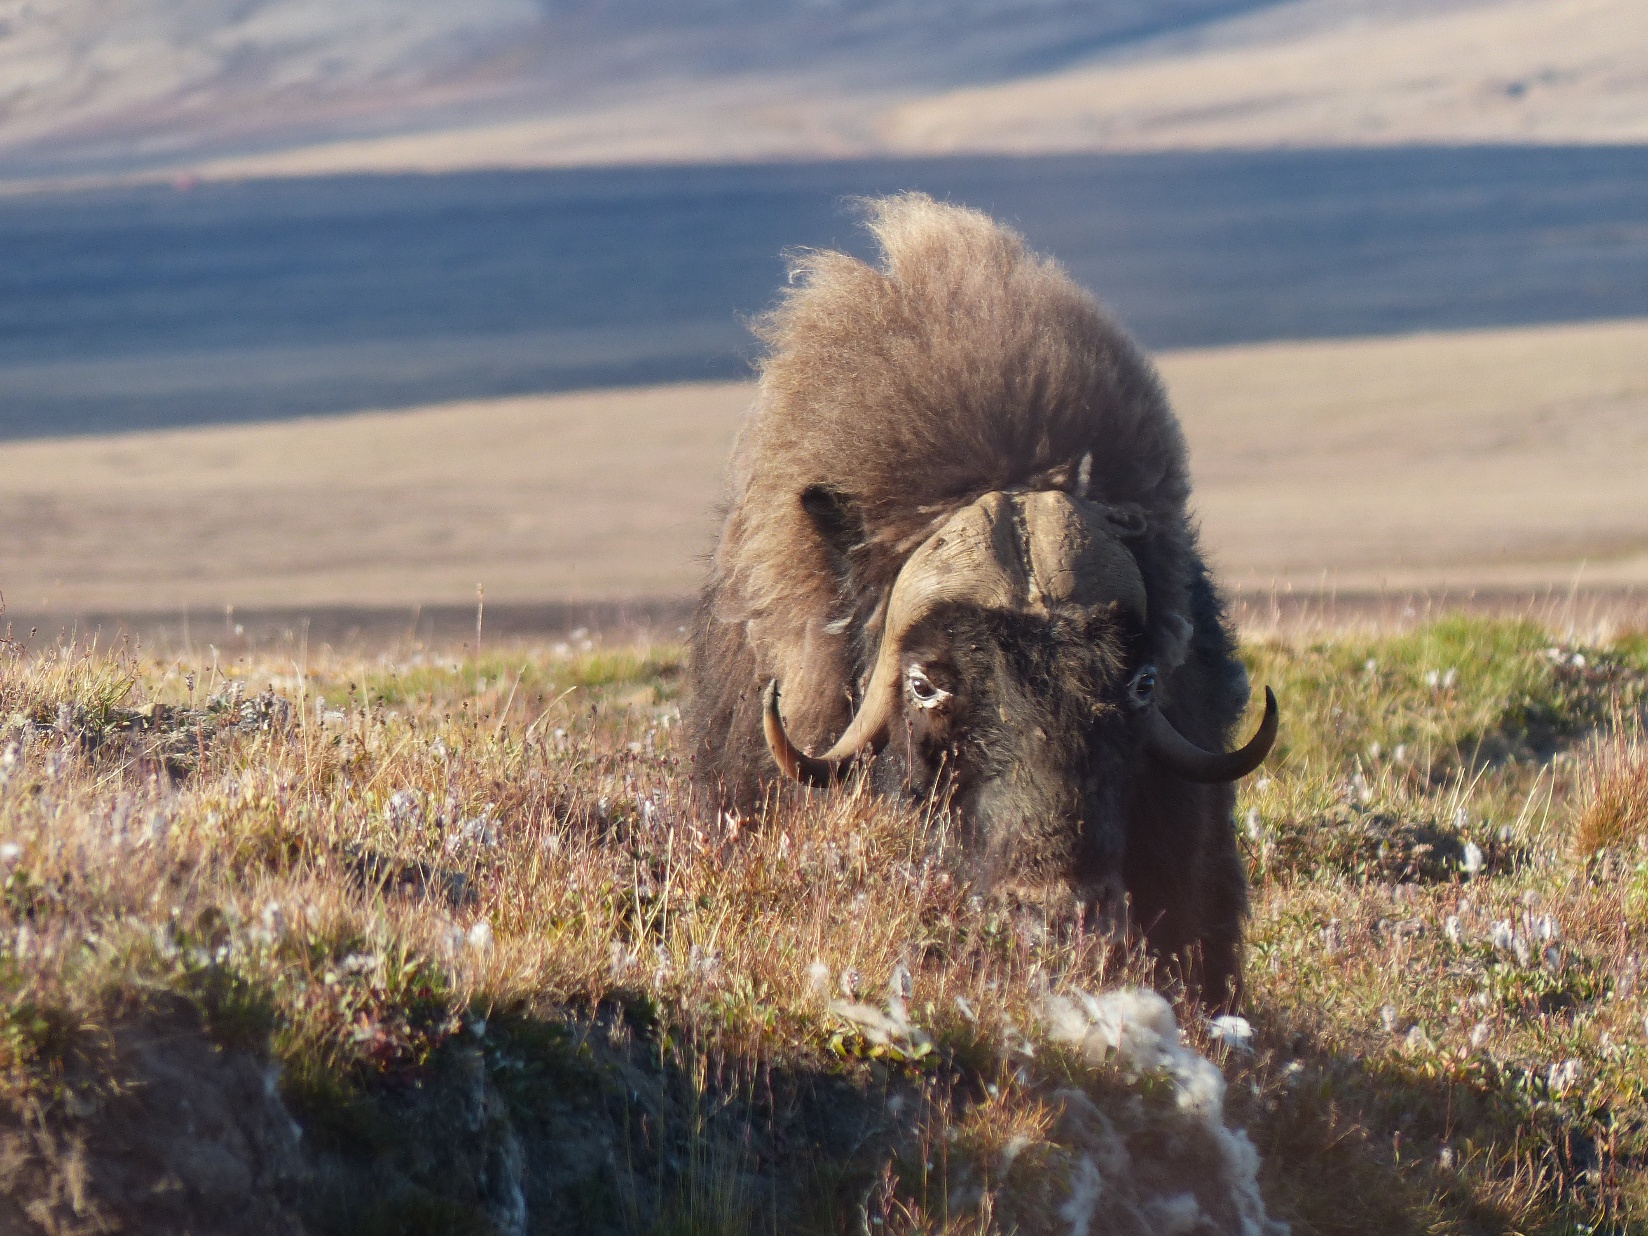

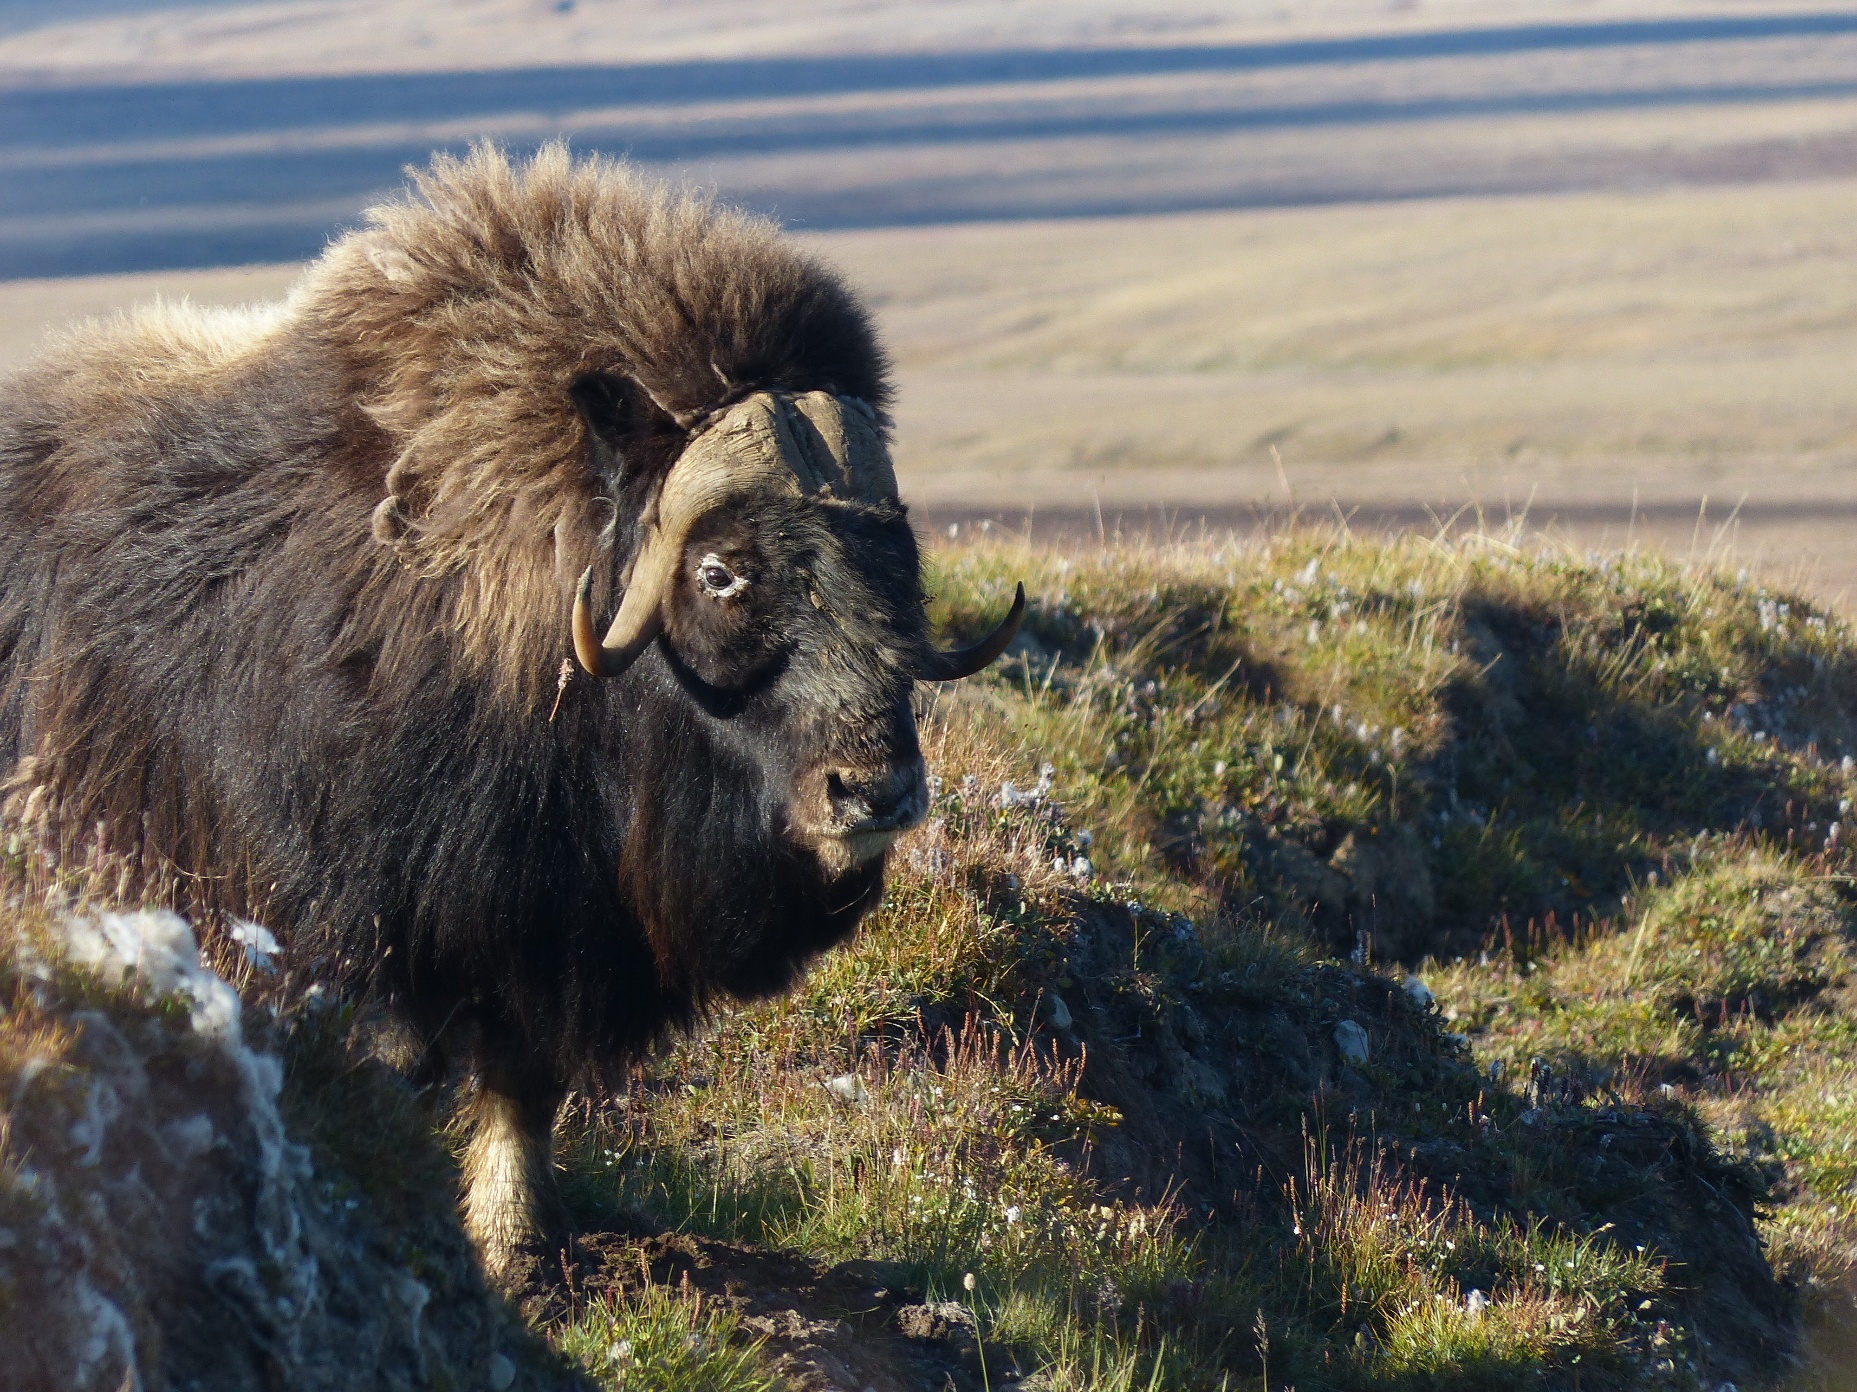


**Supplementary Figure 2. Photos of an adult male muskox showing bilateral periorbital alopecia and nasal discharge.** Photos were taken in August 2022 on the Fosheim Peninsula of Ellesmere Island.


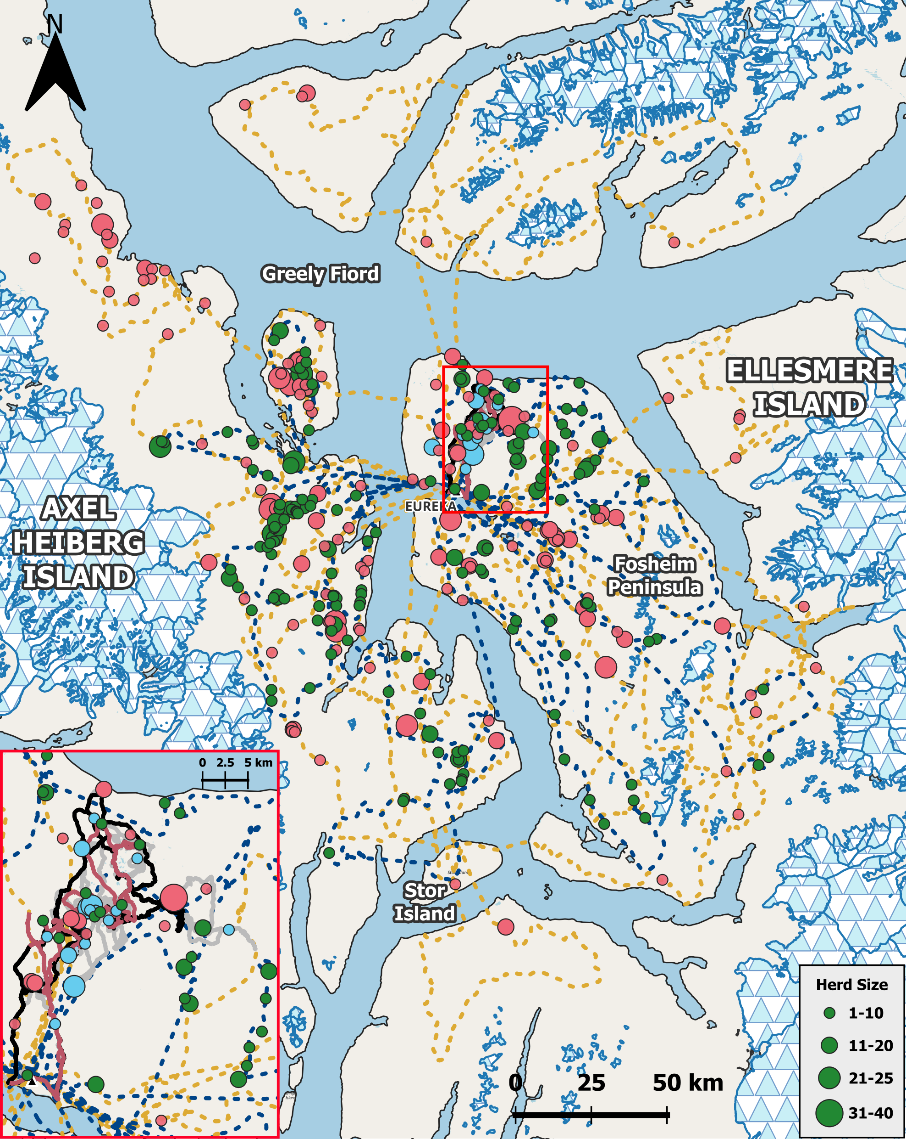


**Supplementary Figure 3.** **Map of west-central Ellesmere Island and eastern Axel Heiberg Island depicting live muskox herd observations** **and routes of travel as depicted in main text Fig. 6.** Observations differentiated by herd size and year of observation are shown by dots of different sizes (green for 2022, pink for 2023, and blue for 2024). 2022 travel routes and herd observations are superimposed on those from 2023 and 2024, and 2023 travel routes and herd observations are superimposed on those from 2024 where overlap exists. Maps developed using QGIS88 version 3.40.1 (“Bratislava”). Available at: <https://www.qgis.org>.

**Supplementary Figure 4. Time series of photos showing vegetative “greening” of a muskox mortality site.** The presented photos were collected at the carcass site of MX-21-02. Approximately 1 year has transpired between each photo, beginning in 2021 (A) and ending in 2024 (D).


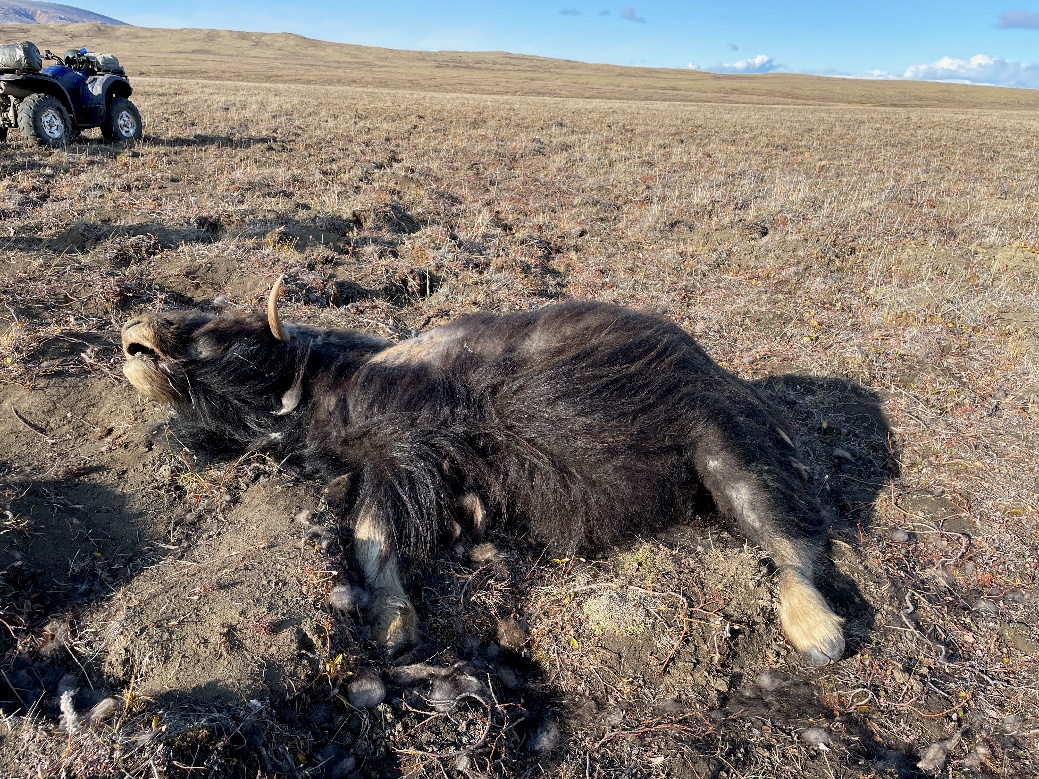

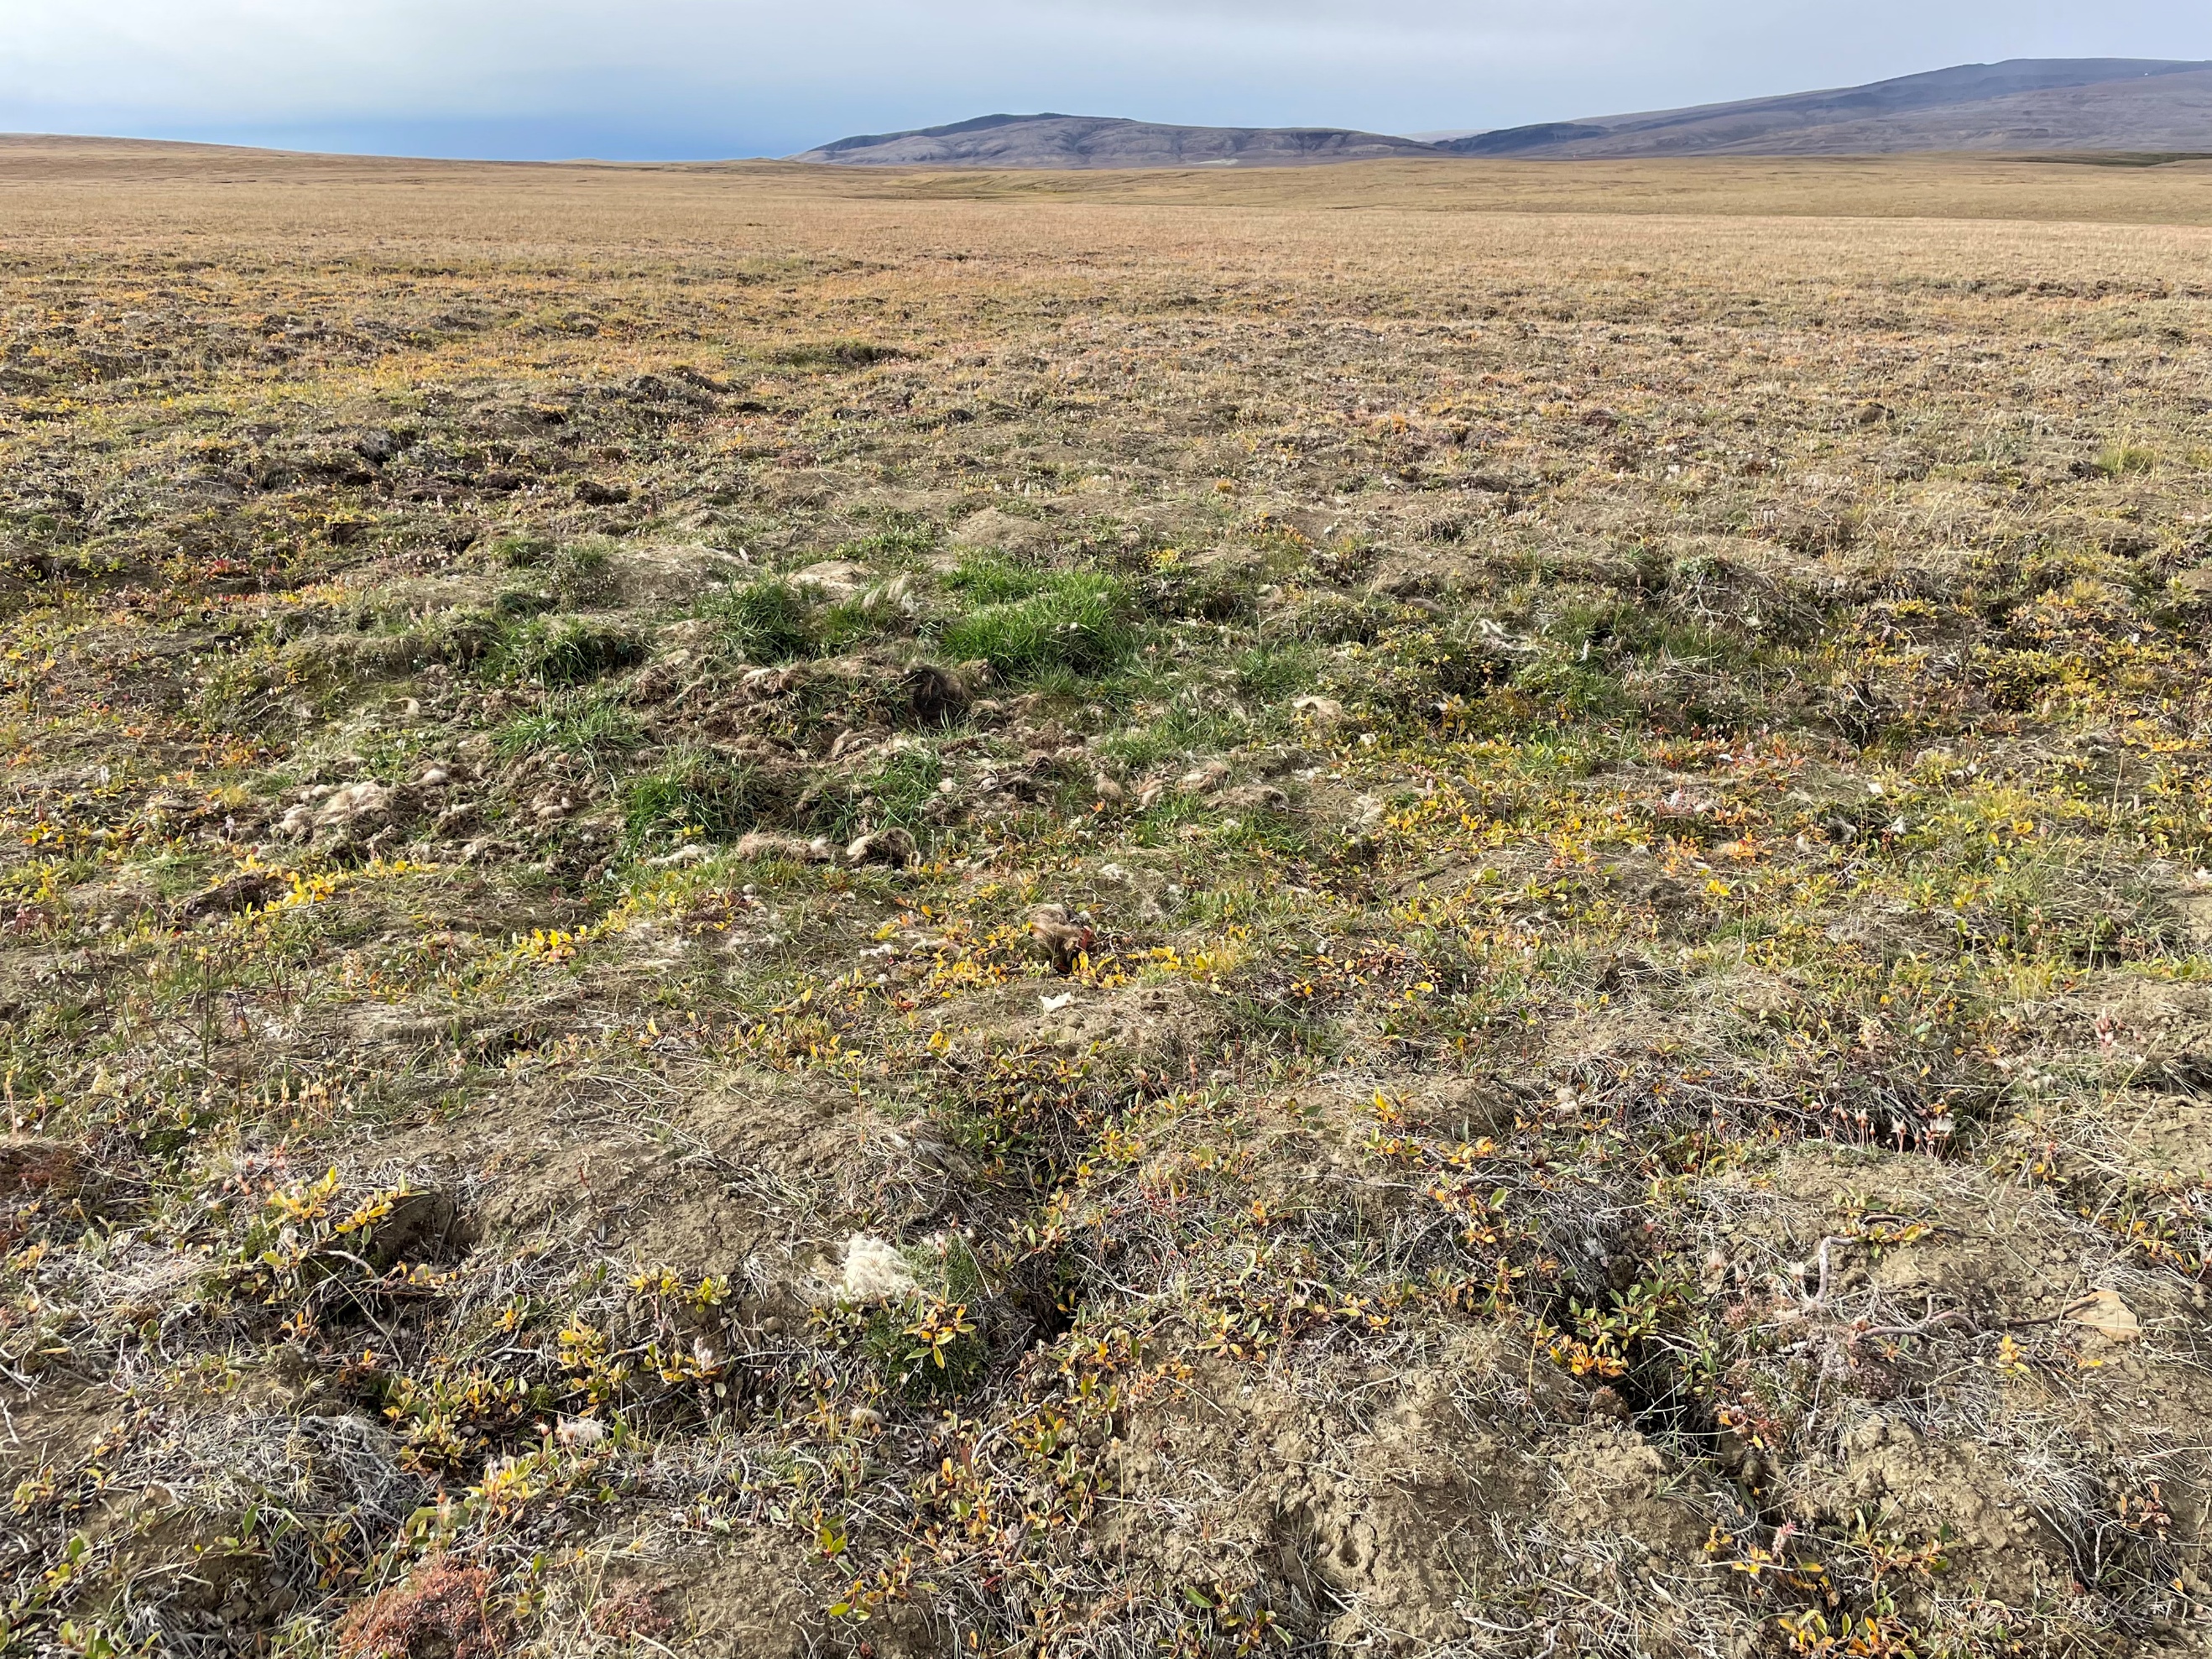

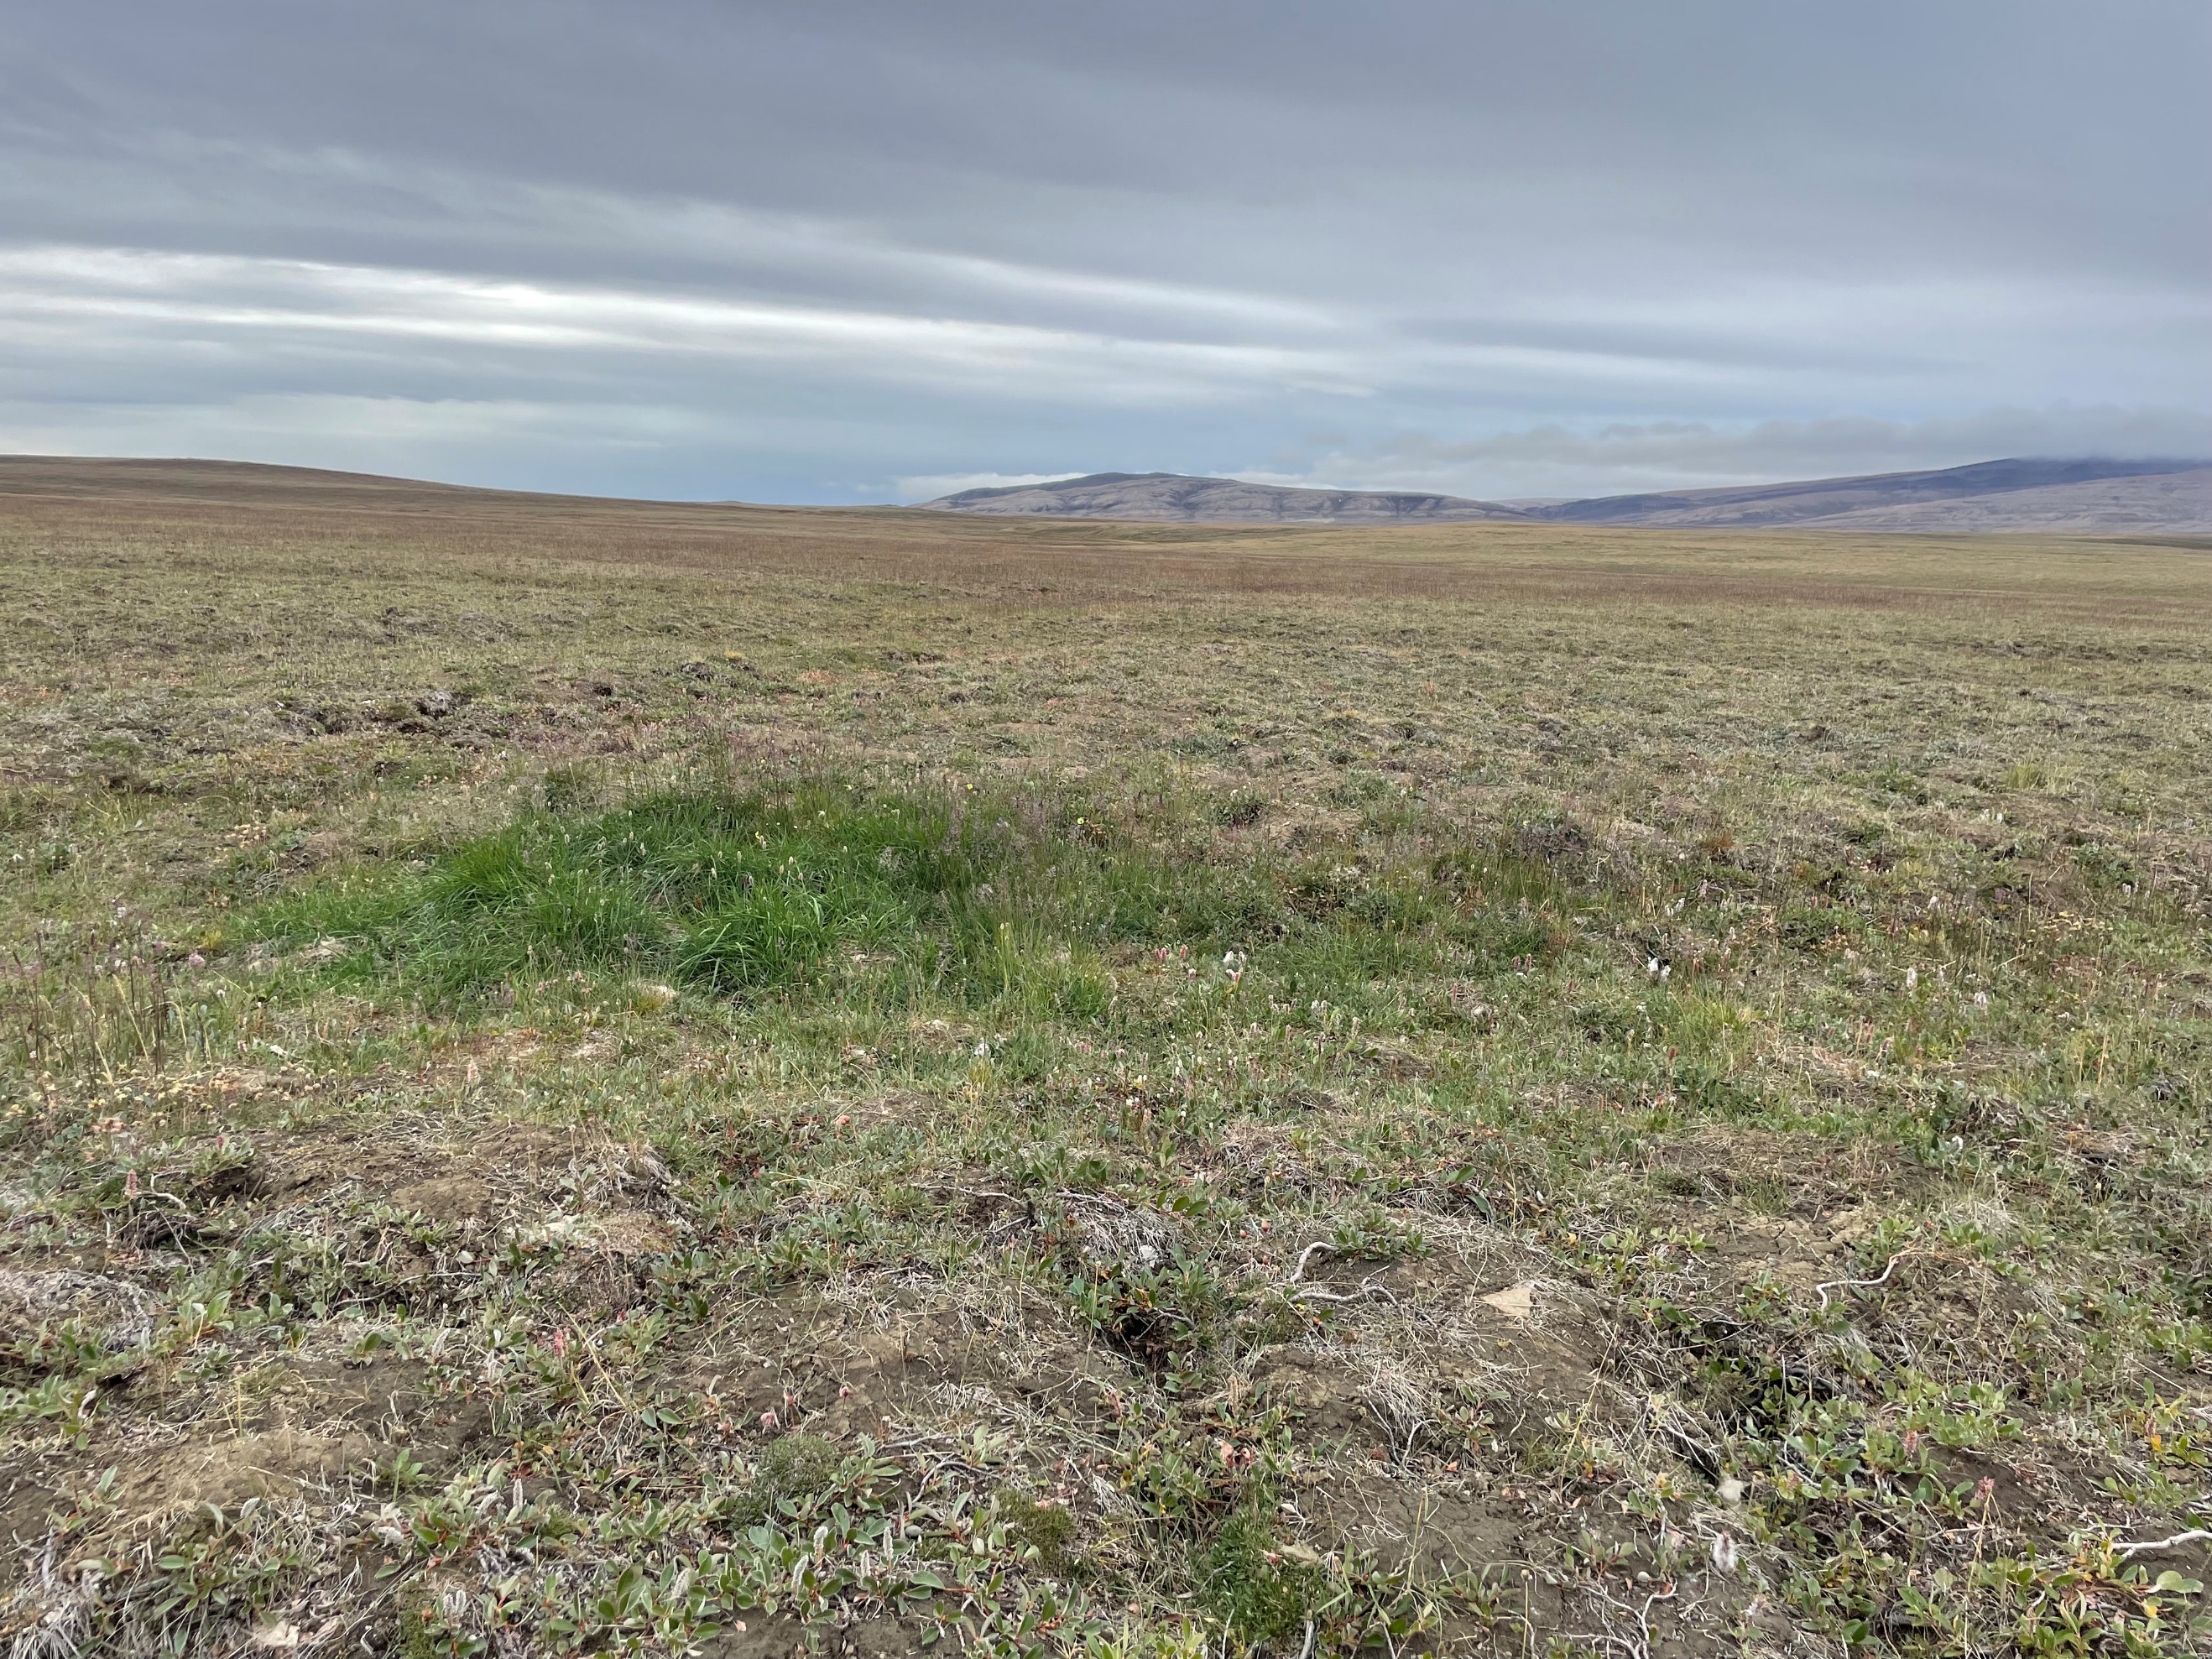

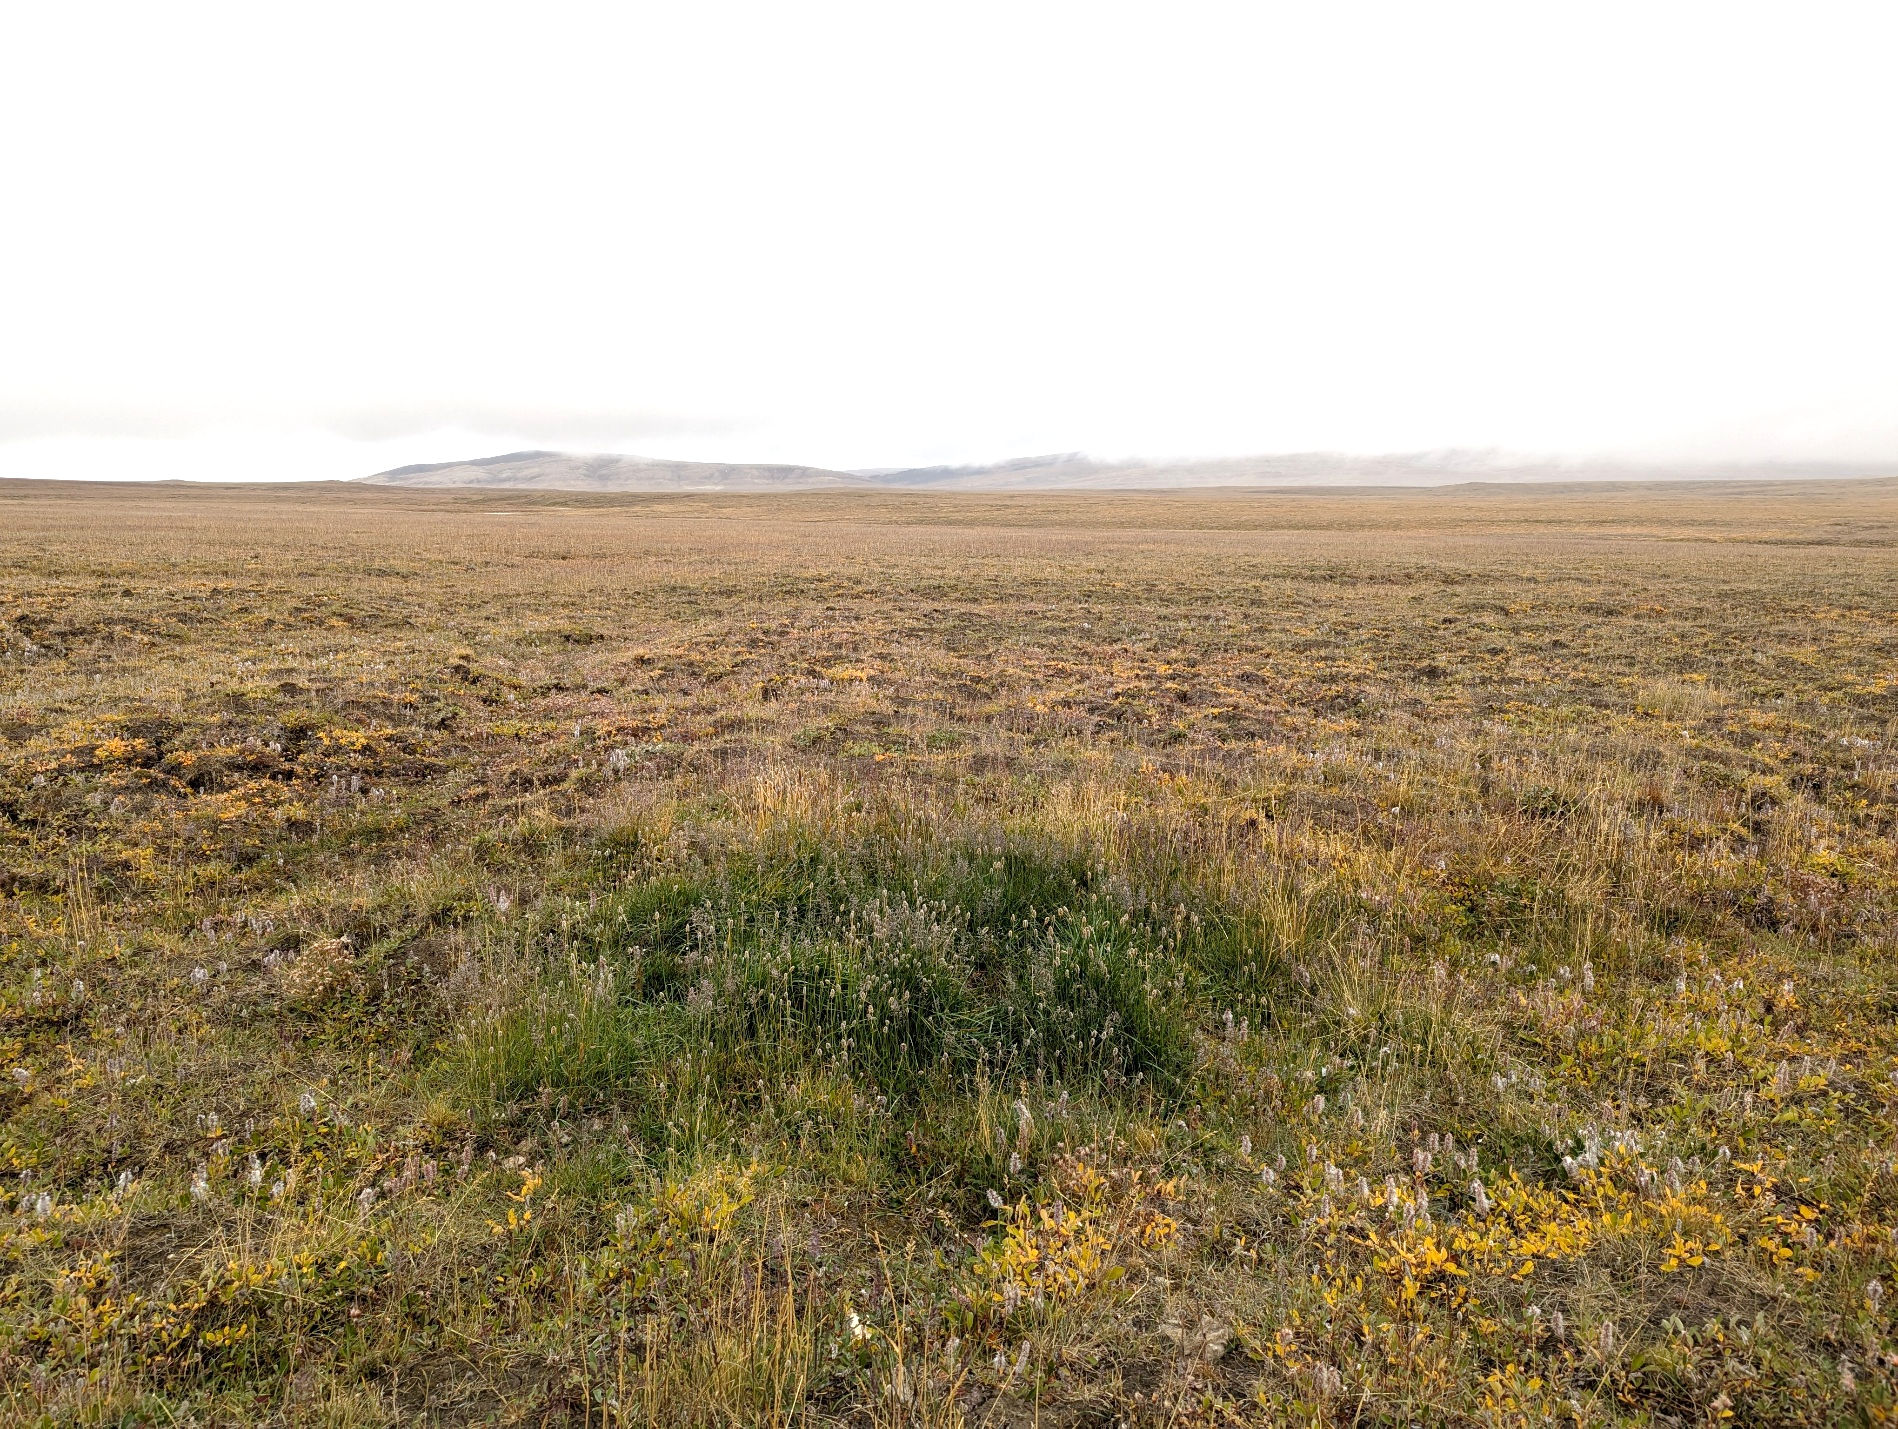


**A**

**D**

**C**

**B**
